# Supplementary material for: Reduced Low–Pressure Membrane Fouling by Inline Coagulation Pretreatment for a Colored River Water
Source: MDPI journal article supplement (doi:10.3390/membranes12111028), 2022-10-22
Supplement: s1 [file s1]

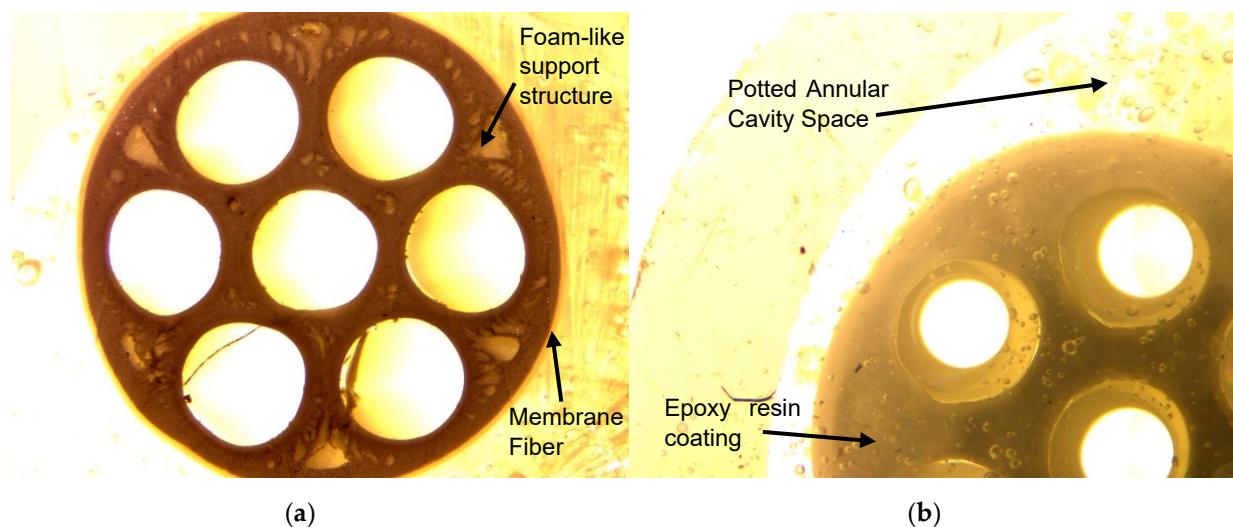

**Figure S1.** Potted tubular monolith fiber: **(a)** prior to sealing foam-like support structure; **(b)** after sealing support structure.

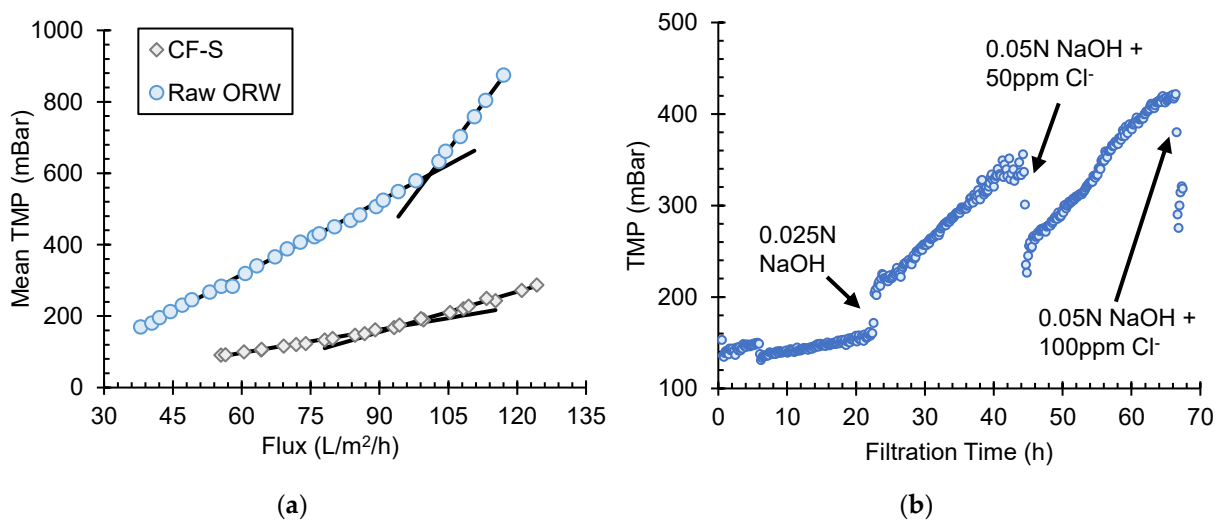

**Figure S2.** Preliminary testing: **(a)** critical flux determination; **(b)** CEB optimization.

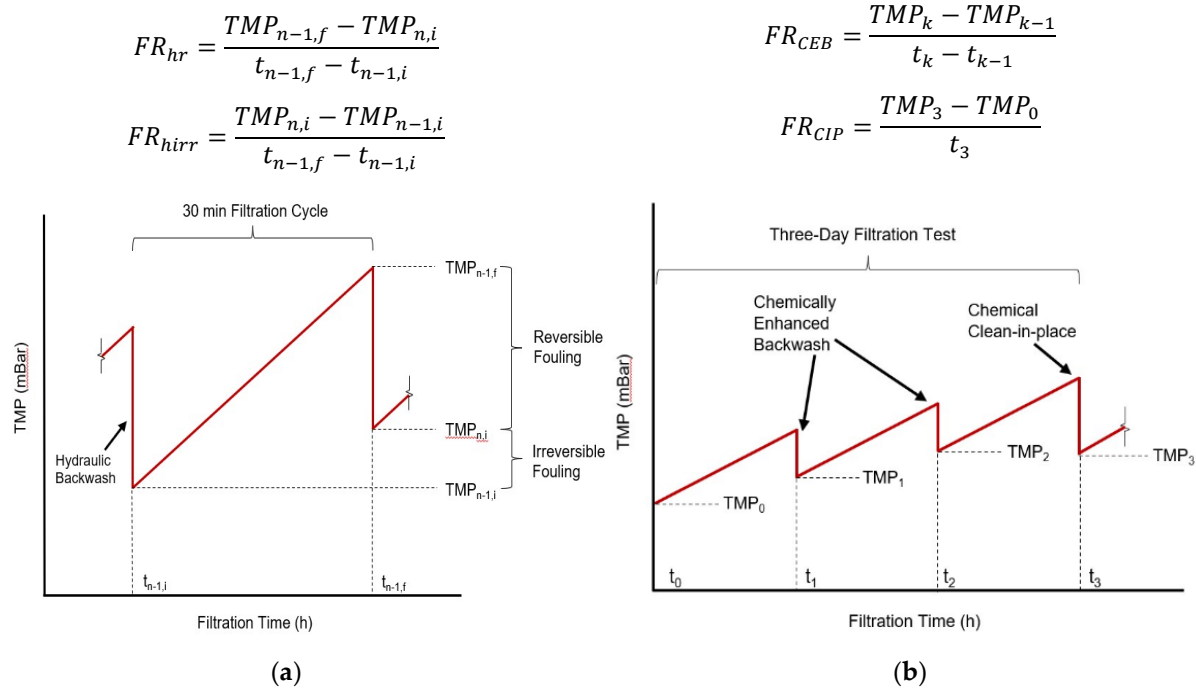

**Figure S3.** Fouling rate computation: (a) individual filtration cycle reversible and irreversible fouling rate; (b) chemically irreversible fouling rates.

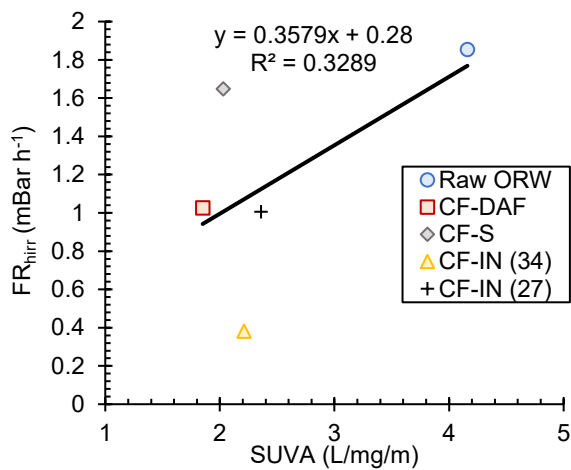

**Figure S4.** Relationship between  $FR_{hirr}$  and SUVA.

**Table S1.** TMC membrane fouling rates.

| Parameter                                  | Raw ORW     | CF-DAF      | CF-S        | CF-IN (34 mg L <sup>-1</sup> ) |             | CF-IN (27 mg L <sup>-1</sup> ) |             |
|--------------------------------------------|-------------|-------------|-------------|--------------------------------|-------------|--------------------------------|-------------|
|                                            | Winter      | Winter      | Winter      | Winter                         | Summer      | Winter                         | Summer      |
| FR <sub>hr</sub> (mBar h <sup>-1</sup> )   | 35.1 ± 1.12 | 9.77 ± 0.50 | 8.50 ± 0.44 | 12.5 ± 1.0                     | 11.7 ± 0.51 | 9.23 ± 0.53                    | 16.8 ± 0.82 |
| FR <sub>hirr</sub> (mBar h <sup>-1</sup> ) | 1.85 ± 0.51 | 1.03 ± 0.38 | 1.65 ± 0.43 | 0.46 ± 0.27                    | 0.28 ± 0.43 | 1.0 ± 0.59                     | 0.25 ± 0.41 |
| FR <sub>TOT</sub> (mBar h <sup>-1</sup> )  | 37 ± 1.15   | 10.8 ± 0.61 | 10.2 ± 0.55 | 13 ± 1.02                      | 11.9 ± 0.56 | 10.2 ± 0.71                    | 17.1 ± 0.84 |
| FR <sub>CEB</sub> (mBar h <sup>-1</sup> )  | 0.474       | 0.615       | 0.481       | 0.014                          | 0.256       | 0.516                          | 0.132       |
| FR <sub>CIP</sub> (mBar h <sup>-1</sup> )  | 0.880       | 0.815       | 0.420       | 0.027                          | 0.190       | 0.683                          | 0.119       |
